# Supplementary material
Source: publisher figshare collection journal article supplement (https://tandf.figshare.com/ndownloader/files/20467761)

SUPPORTING INFORMATIONS

**Identification of a peptide-hybrid based HIV protease inhibitor with in vitro activity against Zika virus NS2B-NS3 protease**

Dario Akaberia,b, Praveen K. Chinthakindidc, Amanda Båhlströmc, Navaneethan Palanisamyd, Anja Sandströmc, Åke Lundkvistb, Johan Lennerstranda*

a Clinical Microbiology, Department of Medical Sciences, Uppsala University, Uppsala, Sweden

b Zoonosis Science Center, Department of Medical Biochemistry and Microbiology, Uppsala University, Uppsala, Sweden

c Department of Medicinal Chemistry, Drug Design and Discovery, Uppsala University, Uppsala, Sweden

d HBIGS, University of Heidelberg, Heidelberg, Germany; Institute of Biology II, University of Freiburg, Freiburg, Germany

**Table of Contents**

[**1.HIV protease in complex with compound 9b**](#HIV_protease) **2**

[**2.MD simulations of compound 9b in complex with ZIKV proteases 5GJ4 and 5GPI**](#MD_simulation) **3**

[**3.In vitro enzymatic assay raw data**](#In_vitro_res) **3**

[**4.Expression and purification of ZIKV NS2B-NS3 protease complex**](#Prot_expression) **4**

[**5.Pictures preparation**](#Pictures_preparation) **4**

**6.General information of compound synthesis and characterization 4**

[**6.1.Compound 9b**](#Compound_9b) **4**

[**6.2.Compound 86**](#Compound_86) **4**

[**6.3.Compound 9b purity**](#Compound_9b_purity) **6**

[**6.4.Compound 86 purity**](#Compound_86_purity) **8**

**1.HIV-1 protease in complex with compound 9b**


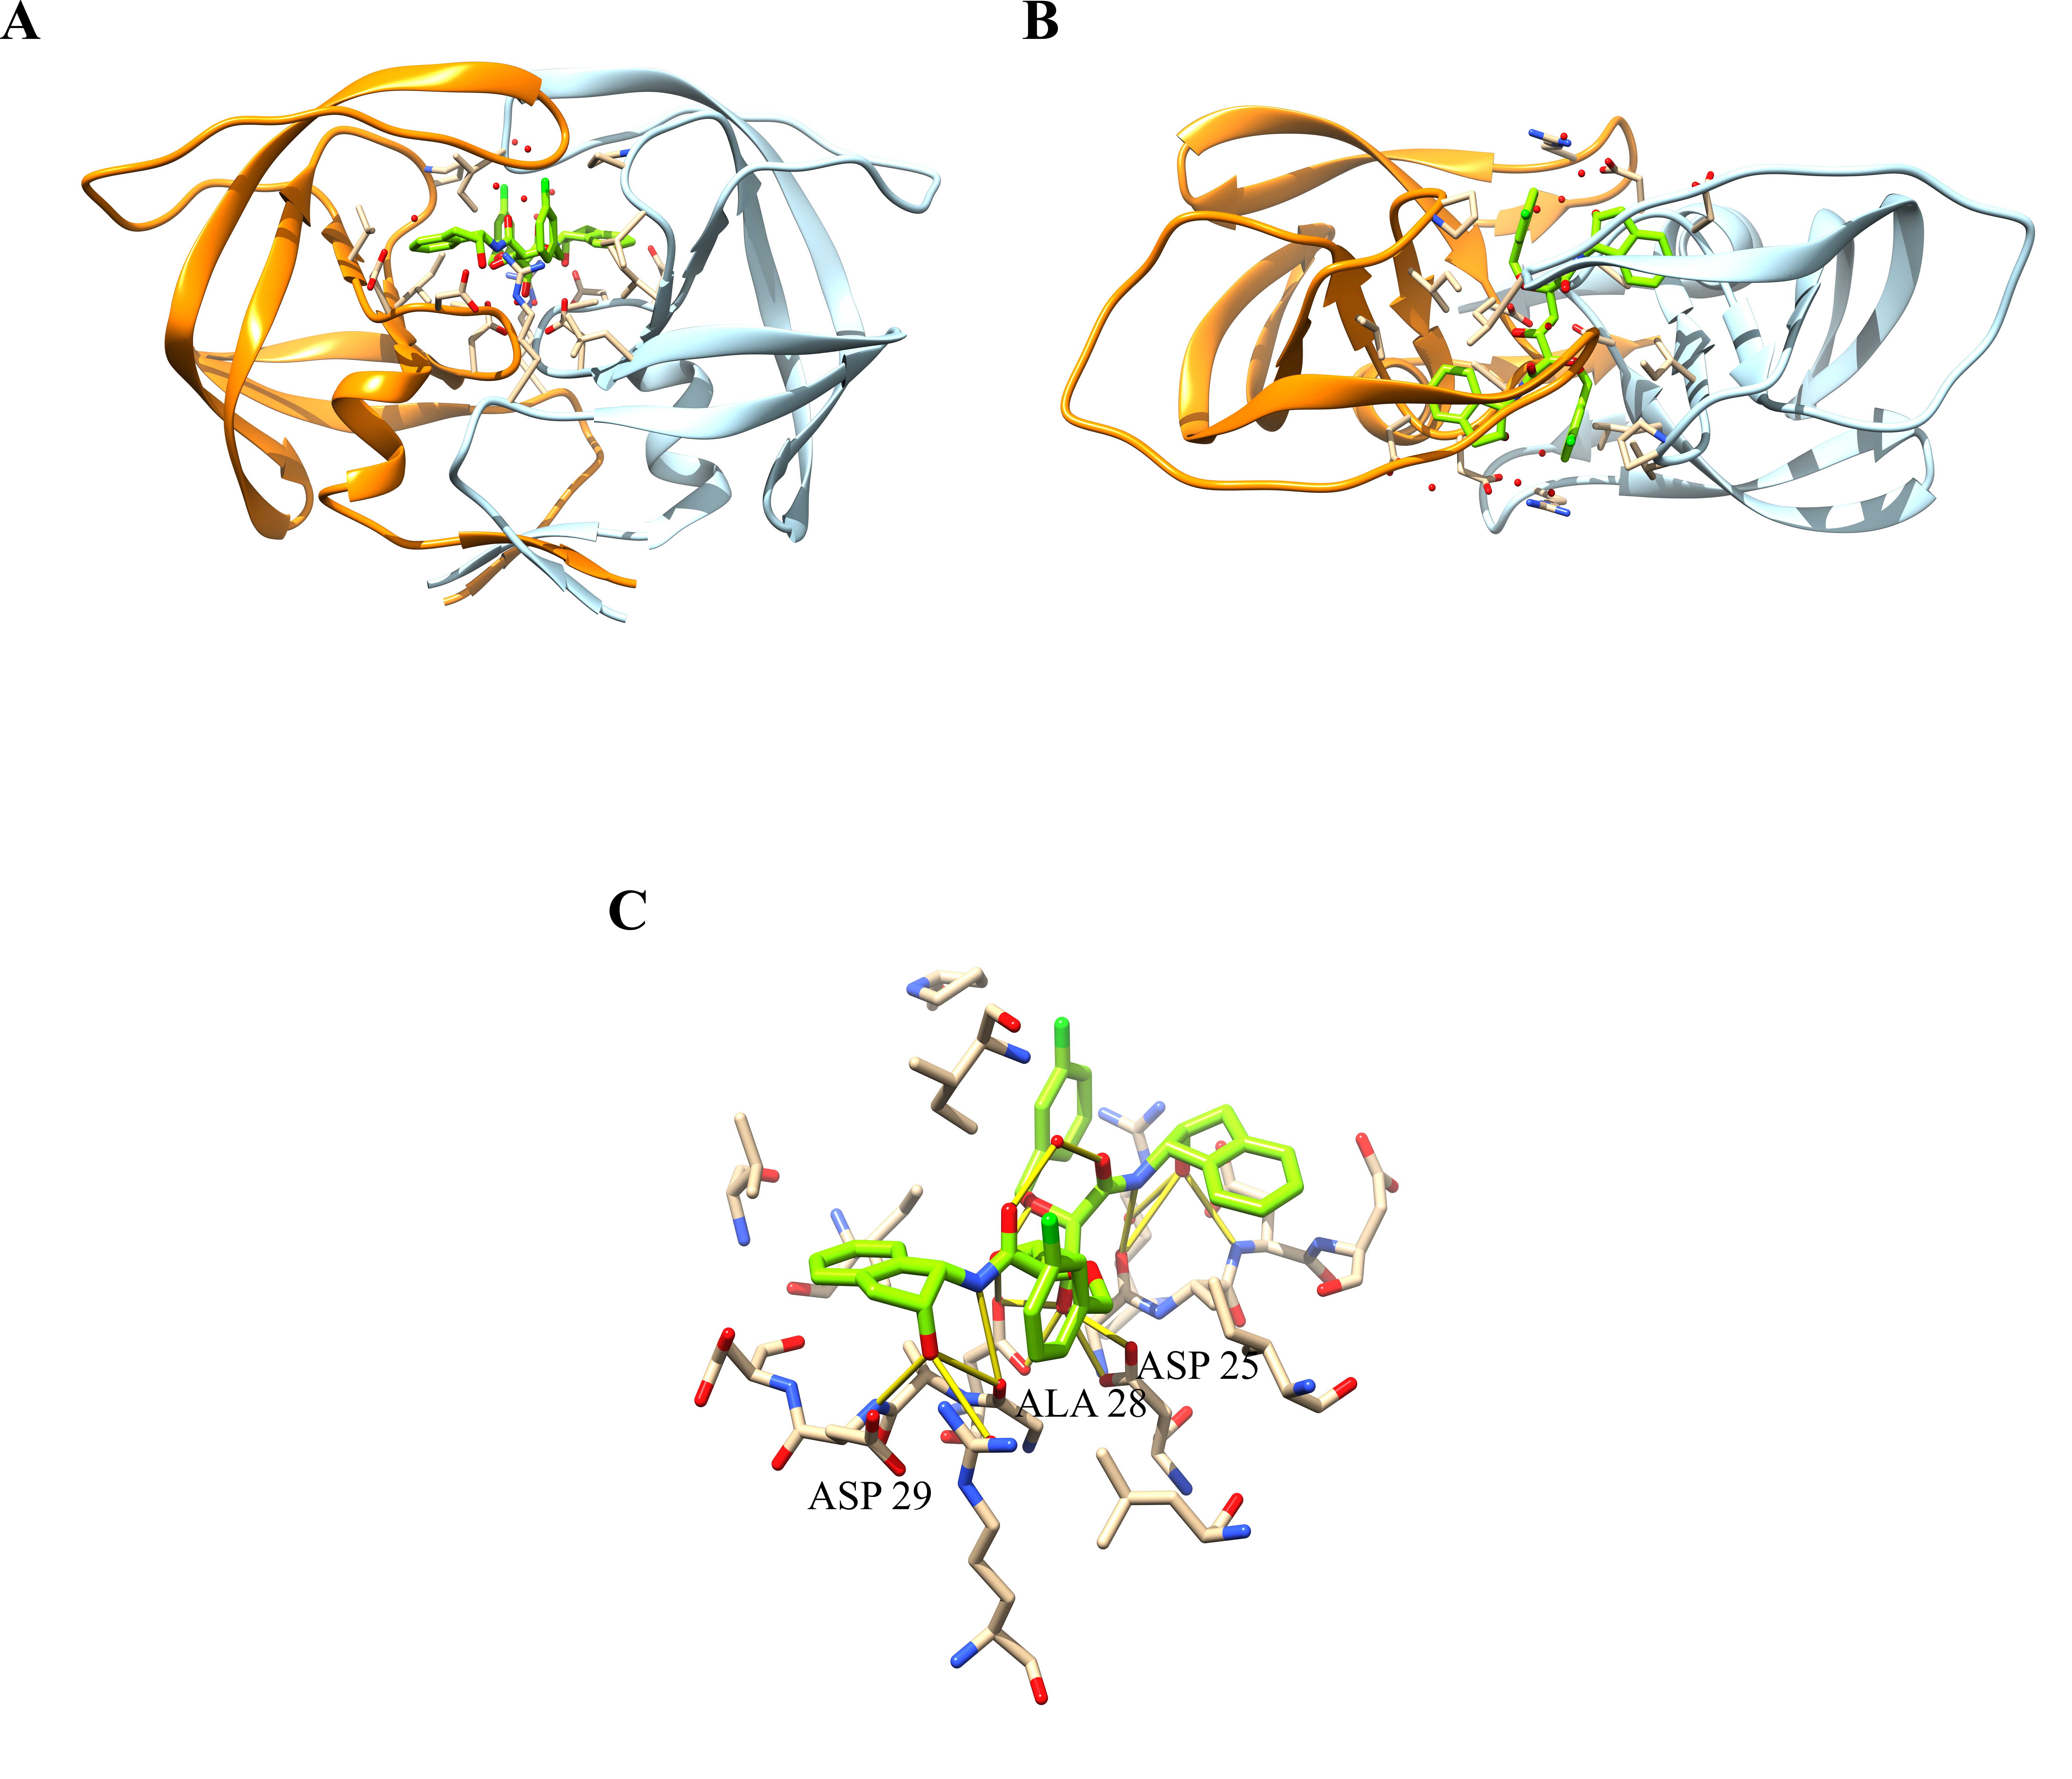


**Figure S1.** HIV aspartyl protease homodimer (shown in blue and orange) in complex with compound 9b, (shown in green) from the PDB crystal structure 1W5V. (A) Frontal view of HIV protease homodimer in complex with compound 9b displaying how the inhibitor is placed at the interface between the two homodimeric subunits of HIV protease. (B) Top view of the HIV protease-compound 9b complex. As it can be seen compound 9b symmetric design allows it to form mirrored interaction with both subunits of HIV protease. (C) Hydrogen bond interaction formed between compound 9b and the HIV protease. As it can be seen, compound 9b interacts with residues ASP29, ALA28, ASP25 of both subunits.

**2.MD simulations of compound 9b in complex with ZIKV proteases 5GJ4 and 5GPI**

Additional MD simulations of the compound **9b** in complex with ZIKV proteases 4GJ4 and 5GPI were performed as describe in the experimental procedure section of this article. Compound **9b** stably bound to ZIKV proteases 5GJ4 and 5GPI through the whole 40 ns of MD simulation without affecting the proteases structural stability and compactness.


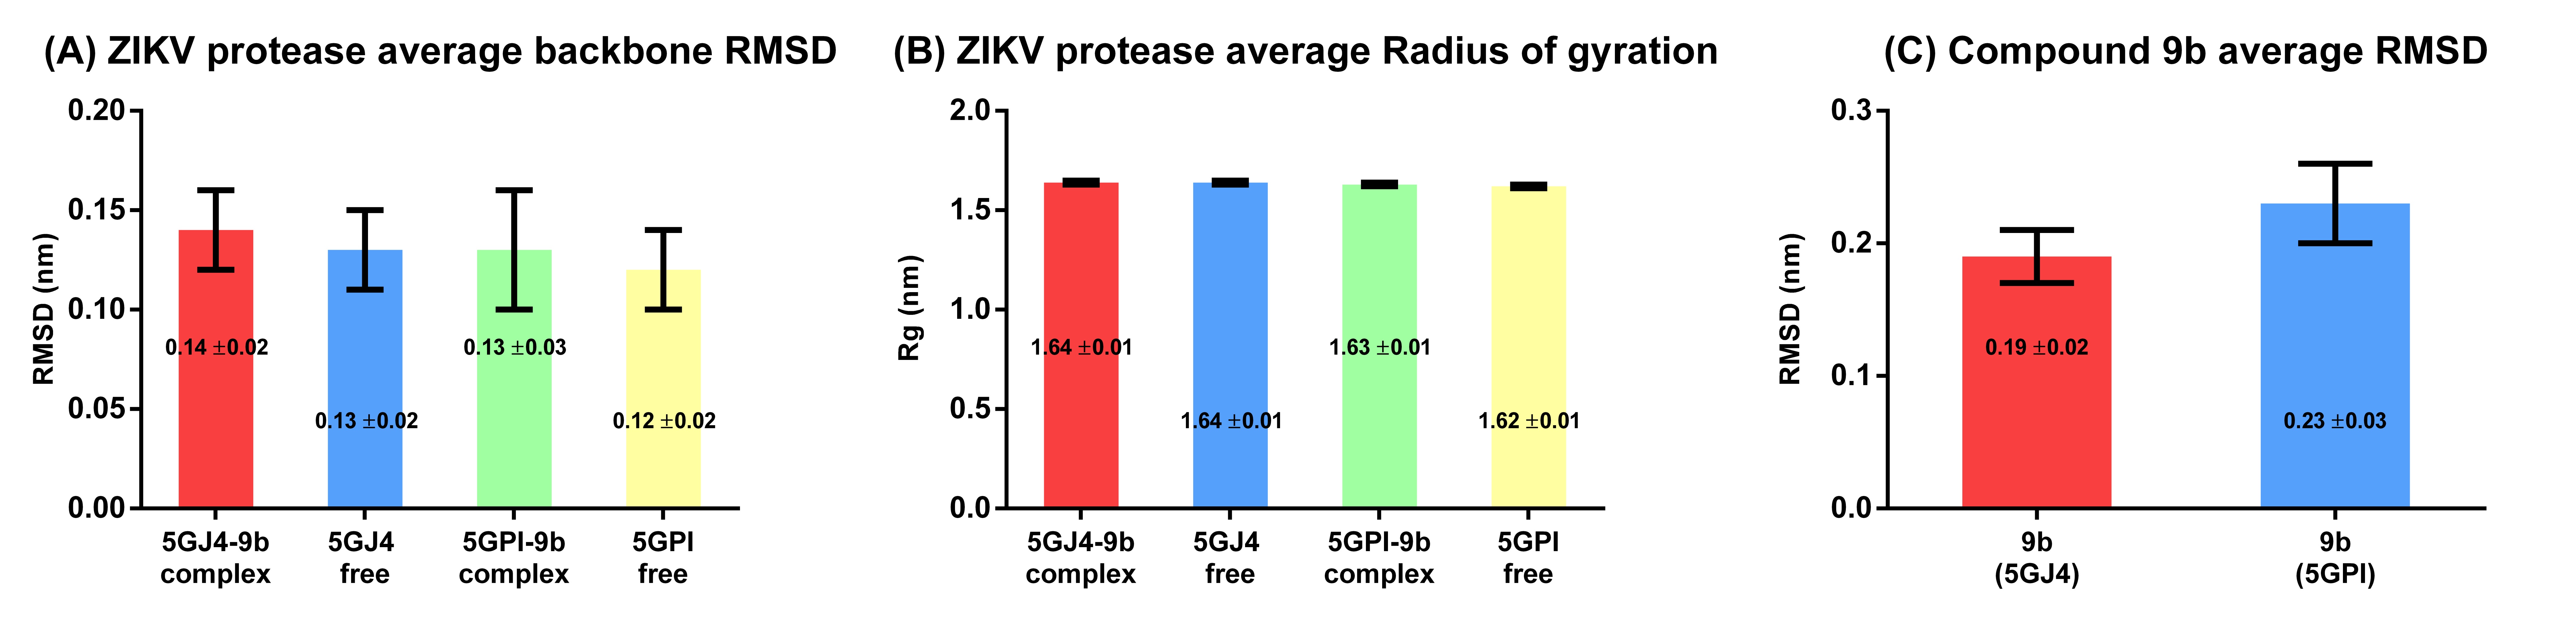


**Figure S2.** Structural stability of bound/free ZIKV proteases 5GPI, 5GJ4 and compounds during the MD simulations. The average RMSD (A) and radius of gyration (B) of ZIKV proteases bound to compound **9b** and in the free form are shown in the bar graphs. The average RMSD of compound **9b** is shown in the bar graph (C). Error bars show the standard deviation.

**3.In vitro enzymatic assay raw data**

The in vitro activity of the compounds **9b**, **86** and indinavir was tested using a FRET-substrate based enzymatic assay as described in the experimental procedure section of this article. Indinavir, which was not stable during MD simulations, was used as negative control. As shown in Figure S2 (A, B) indinavir displayed very low activity against ZIKV protease up to 1mM concentration and therefore an IC50 could not be calculated.


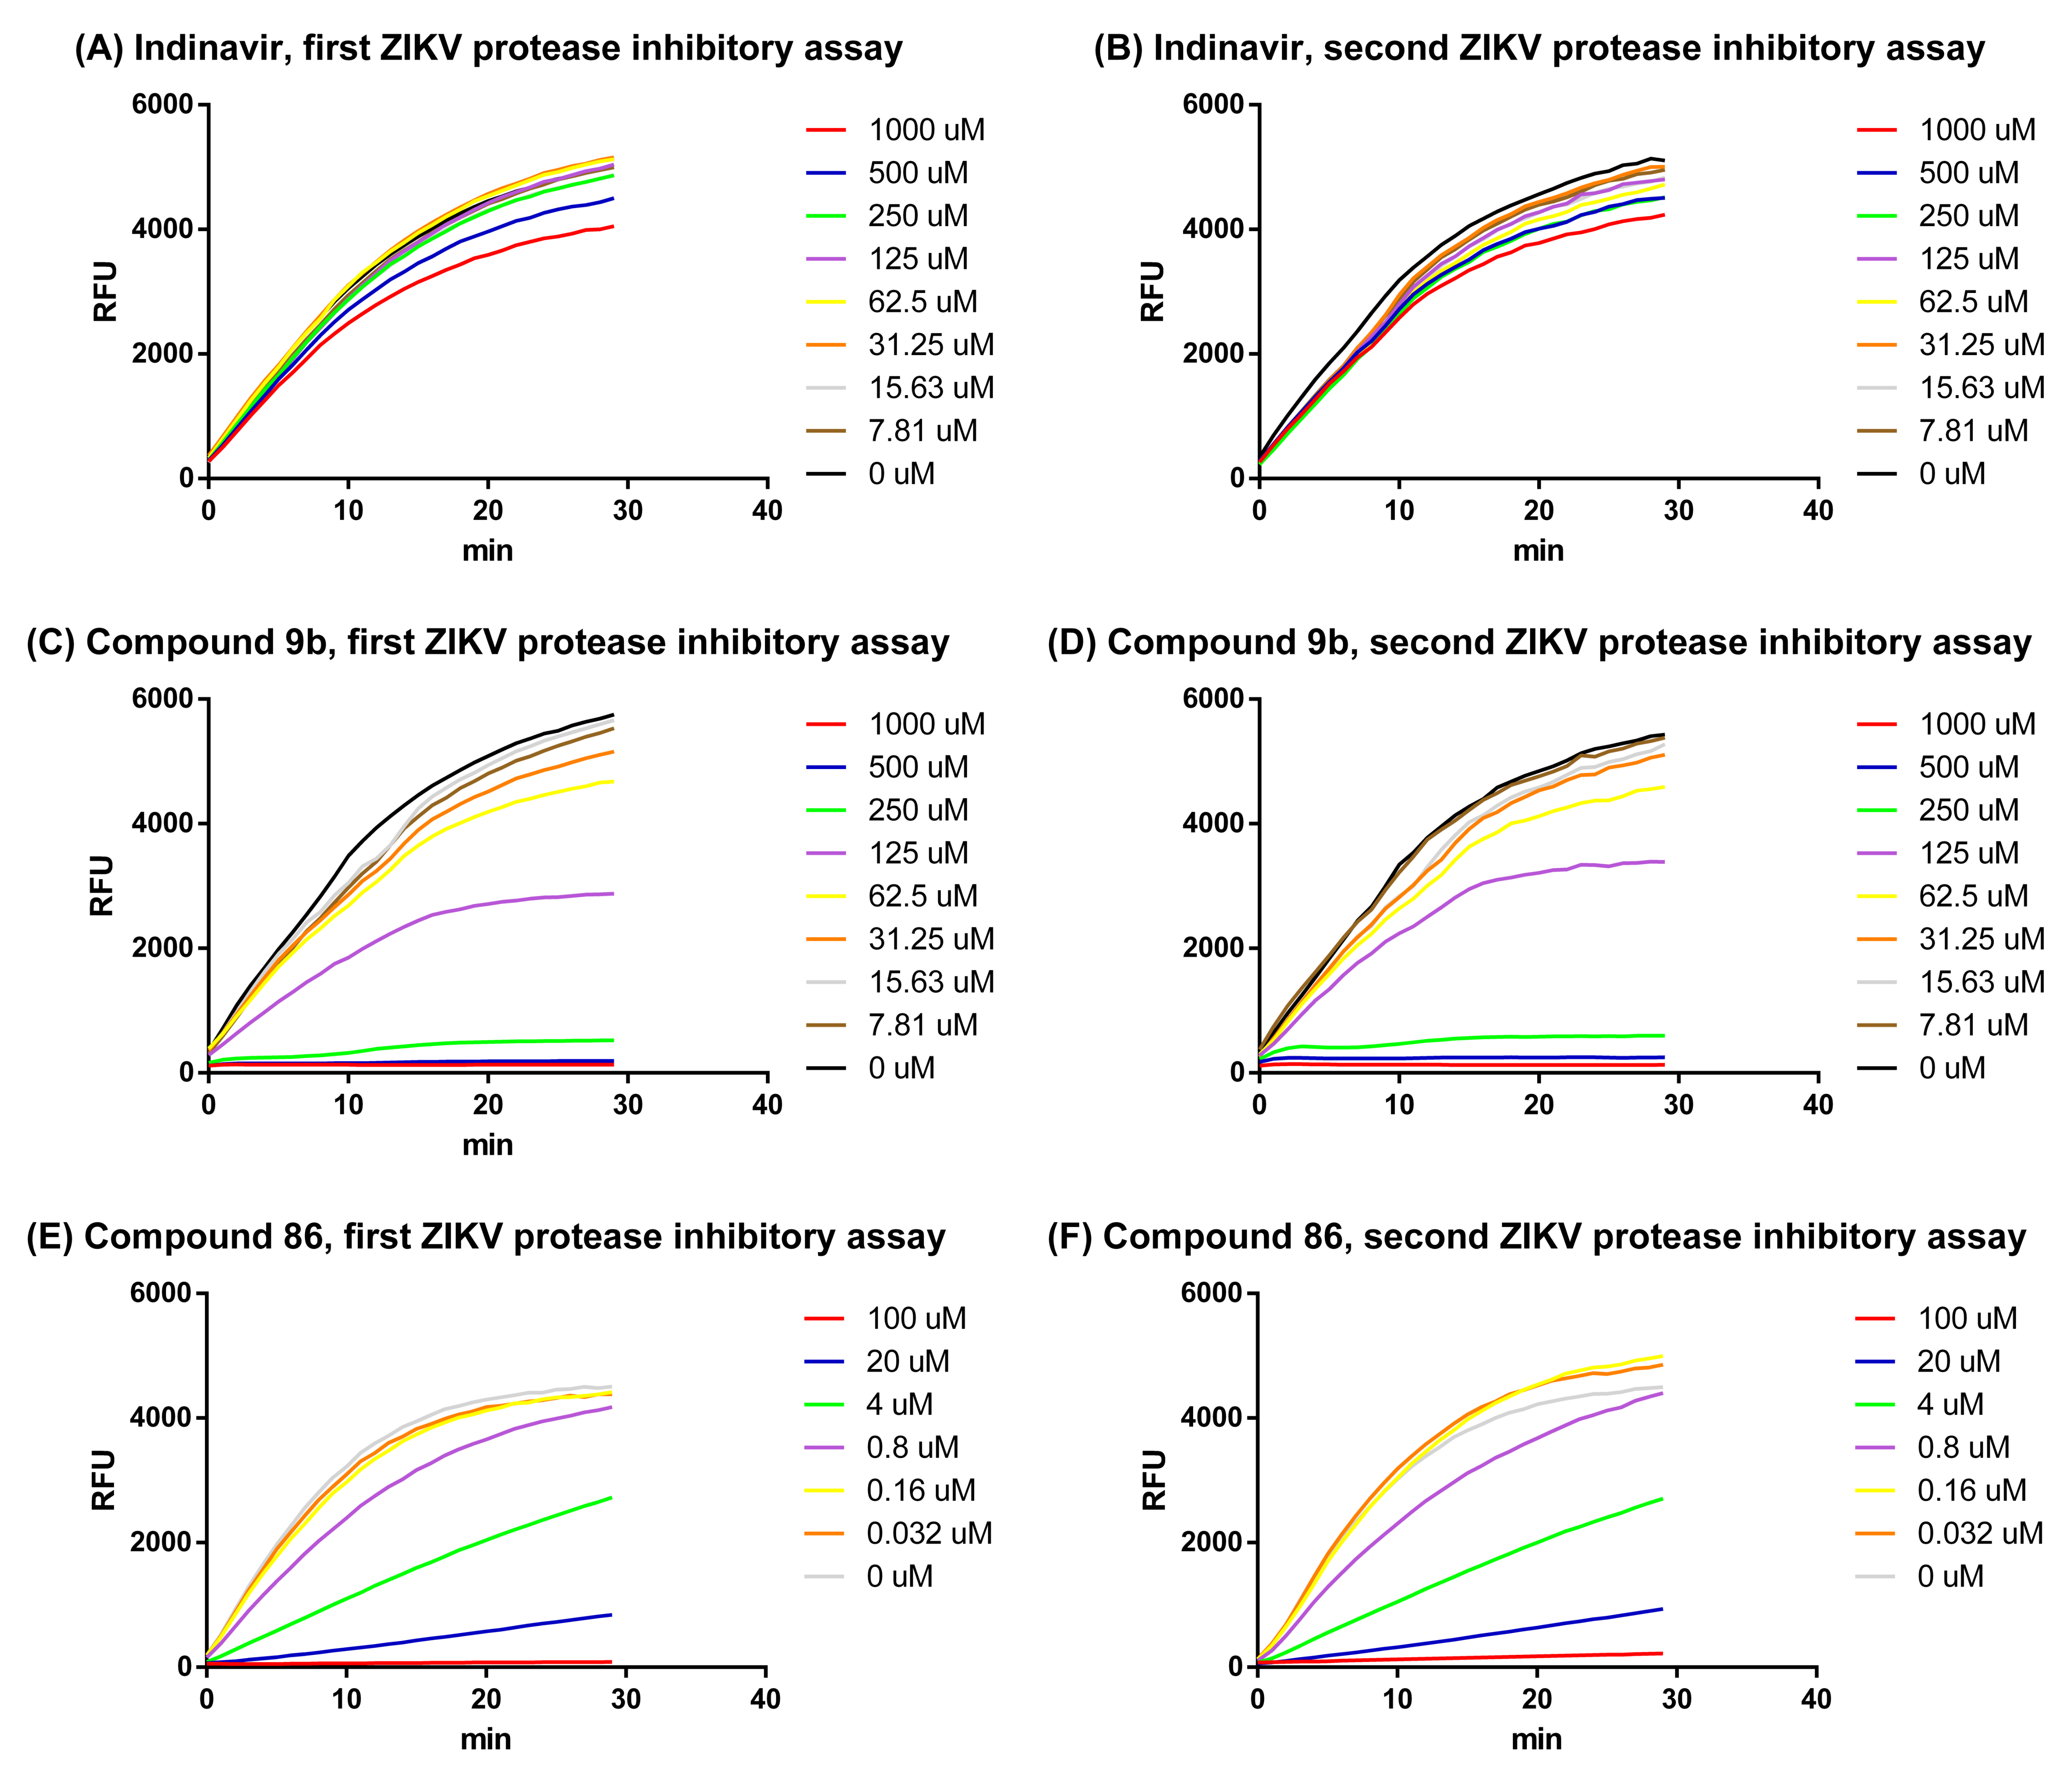


**Figure S3.** Curves from the fluorigenic protease enzymatic assay showing the measured fluorescence over time at different concentration of indinavir (A, B), compounds **9b** (C, D) and compound 86 (E, F). Each experiment was repeated twice.

**4.Expression and purification of ZIKV NS2B-NS3 protease complex**


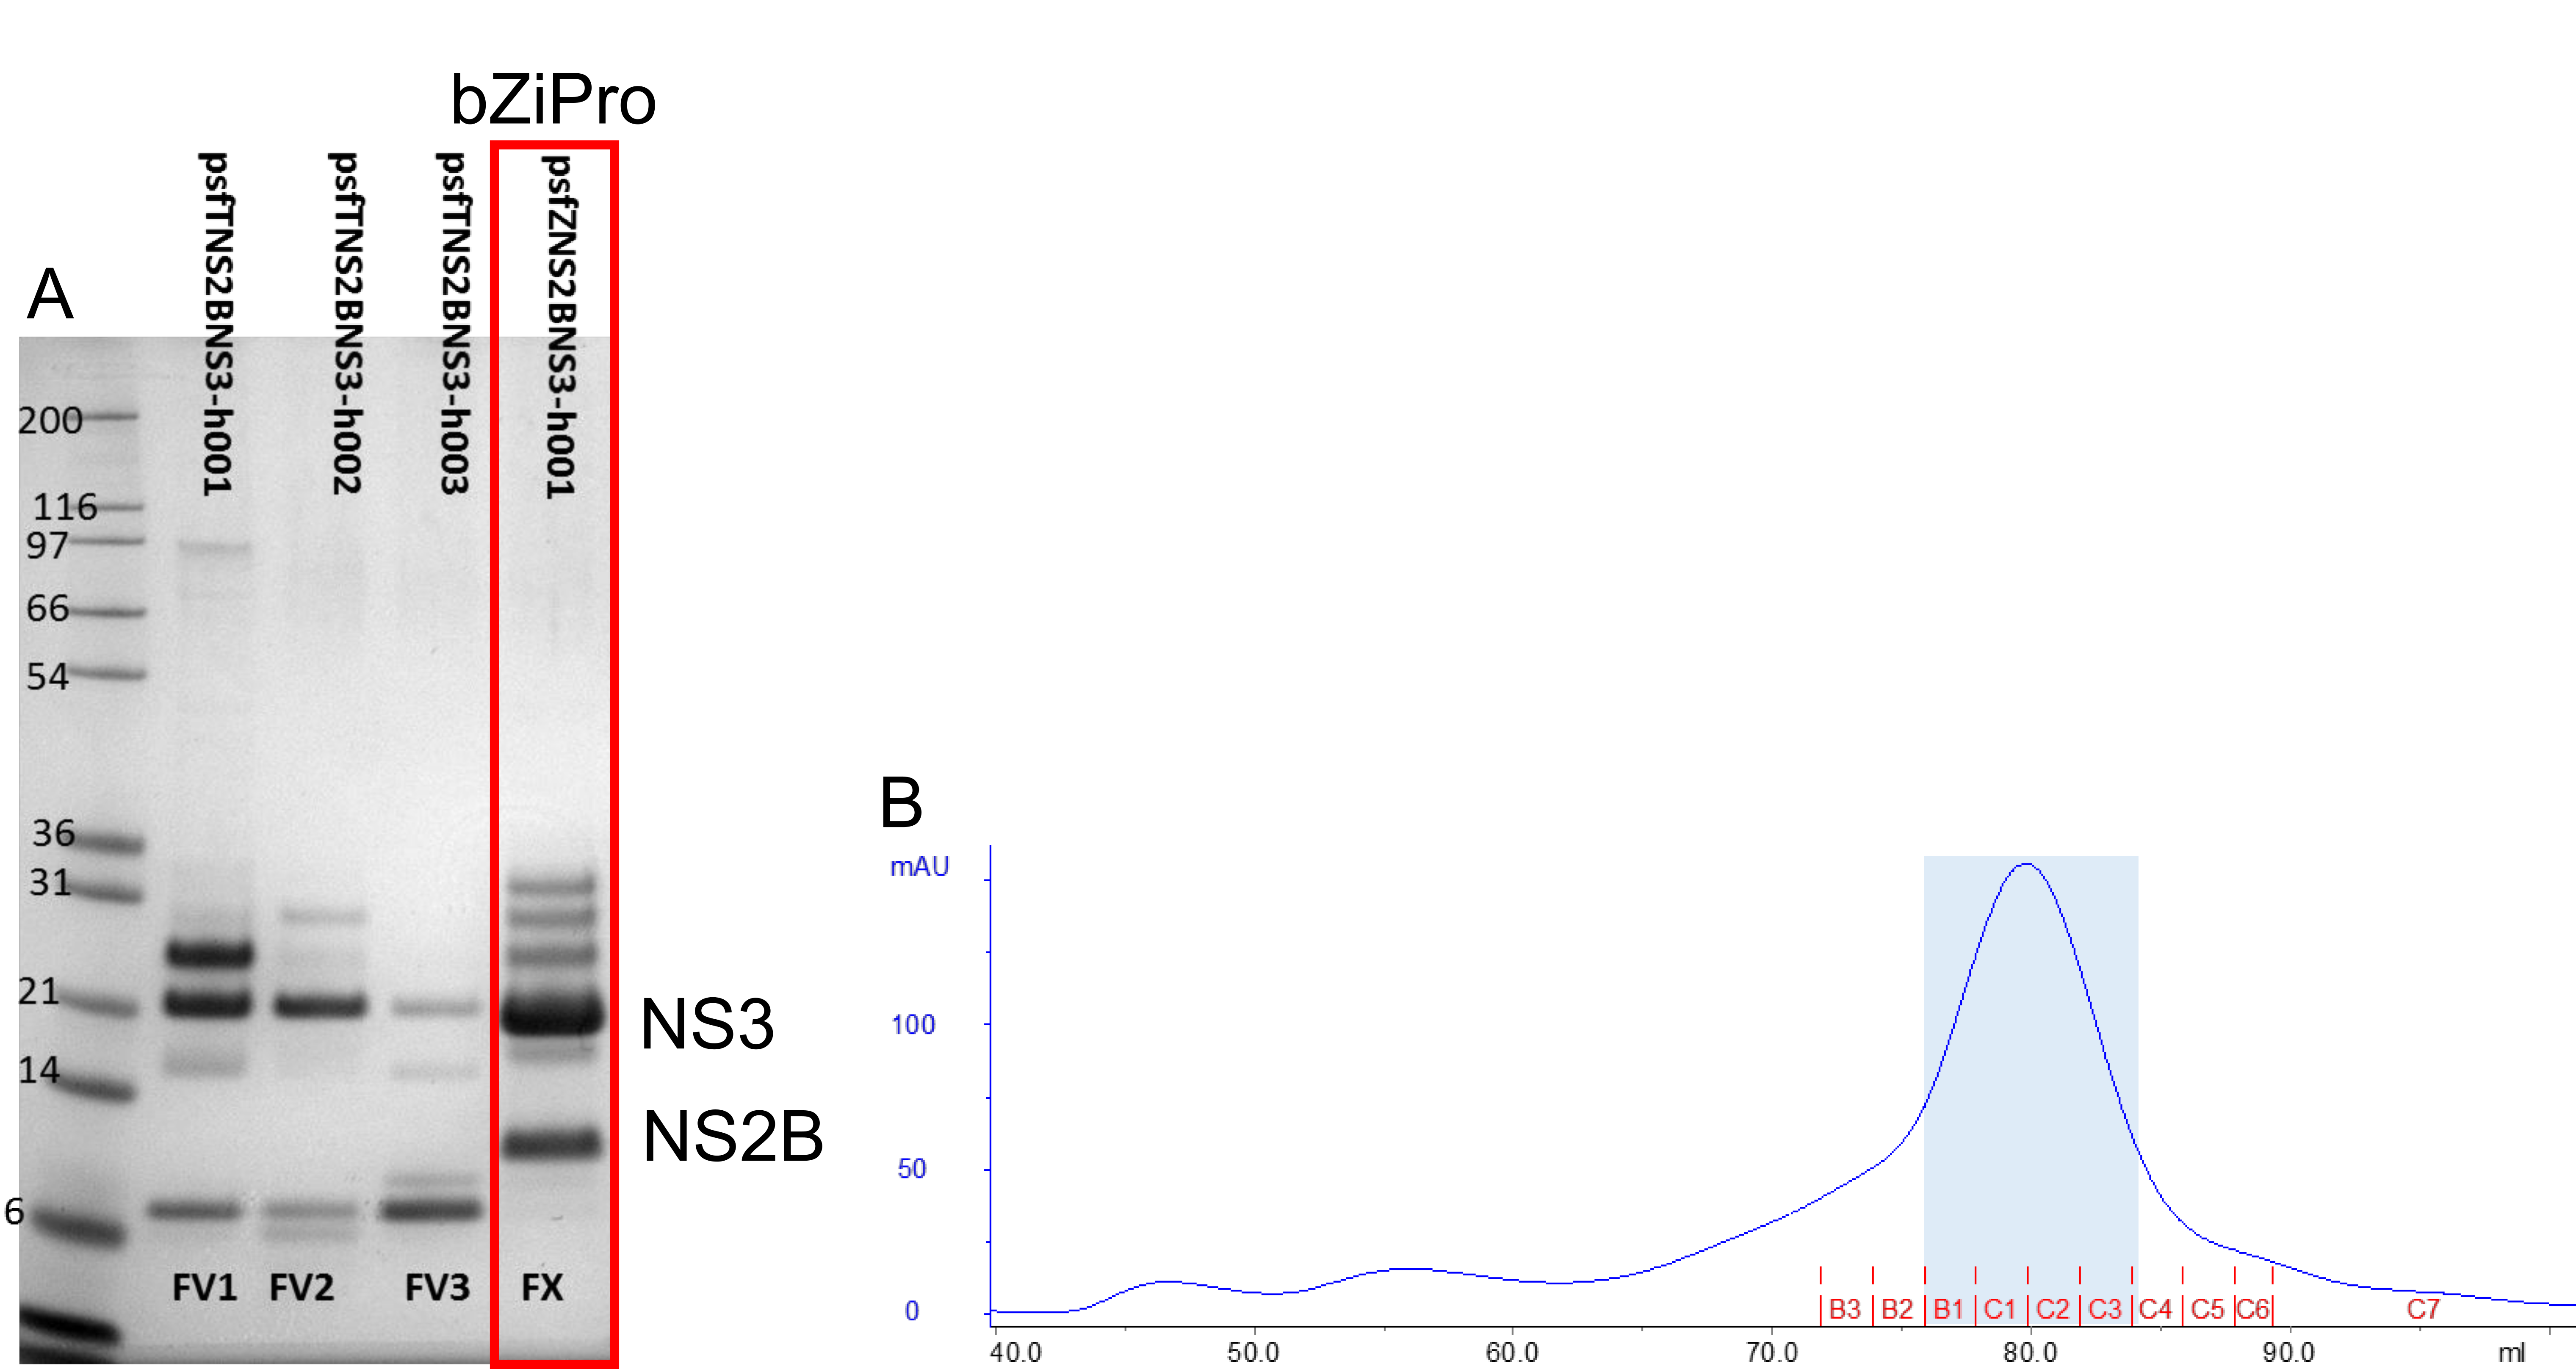


**Figure S4.** Recombinant ZIKV NS2B-NS3 protease. **(A)** The purified unlinked construct bZiPro is visualized on SDS-PAGE (lane within the red frame). NS3 (Mw = 19.2 kDa) migrates close to the 21kDa molecular weight marker band while NS2B (Mw = 8.2 kDa) migrates between the 6 and 14 kDa molecular weight marker band. **(B)** Gel filtration elution profile of the bZiPro construct, prior to pooling.

**5.Pictures preparation**

Figures depicting results from molecular docking and MD simulations were prepared with USCF Chimera1 v1.11. Compounds’ chemical structure figures were prepared using MarvinSketch v16.7.4.0, ChemAxon ([http://www.chemaxon.com](http://www.chemaxon.com/)). The 2D interaction diagrams where manually prepared based on the analysis performed using Discovery Studio v16.1.0.15350 (Dassault Systèmes BIOVIA, San Diego). Microsoft excel was used to plot the average interaction energies between ZIKV protease 5LC0 residues and the compound **9b**.

(1) Pettersen, E. F.; Goddard, T. D.; Huang, C. C.; Couch, G. S.; Greenblatt, D. M.; Meng, E. C.; Ferrin, T. E. UCSF Chimera--a Visualization System for Exploratory Research and Analysis. J Comput Chem 2004, 25 (13), 1605–1612. https://doi.org/10.1002/jcc.20084.

**6.General information of compound synthesis and characterization**

6.1.Compound 9b**:** Synthesis of (2R,3R,4R,5R)-2,5-bis((3-fluorobenzyl)oxy)-3,4-dihydroxy-N1,N6-bis((1R,2S)-2-hydroxy-2,3-dihydro-1H-inden-1-yl)hexanediamide

This compound was synthesized according to literature reported method. [*J. Med. Chem.2001, 44, 3083-3091*](https://pubs.acs.org/doi/abs/10.1021/jm001134q)

1H NMR (400 MHz, CDCl3) δ 7.45 – 7.18 (m, 10H), 7.18 – 6.89 (m, 7H), 5.27 (dd, *J* = 8.9, 5.0 Hz, 2H), 4.66 (s, 4H), 4.55 (td, *J* = 5.2, 2.4 Hz, 2H), 4.36 – 4.11 (m, 4H), 3.01 (dd, *J* = 16.5, 5.5 Hz, 2H), 2.75 (d, *J* = 16.5 Hz, 2H). 13C NMR (101 MHz, CDCl3) δ 171.35 (2C), 163 (d, *J*CF = 246.5, 2C), 140.86 (2C), 139.84 (2C), 139.48 (d, *J*CF = 7.15, 2C), 130.3 (d, *J*CF = 8.19, 2C) , 128.52 (2C), 127.24 (2C), 125.48 (2C), 124.19 (2C), 123.4 (m, 2C), 115.2 (d, *J*CF = 21, 2C), 114.8 (d, *J*CF = 21.8, 2C), 81.53 (2C), 72.66 (2C), 72.55 (2C), 71.76 (2C), 57.98 (2C), 39.27 (2C). HRMS (ESI‐TOF) m/z [M+H]+ calcd. for C38H38F2N2O8: 689.2674, found 689.2700.

6.2.Compound 86**:** Synthesis of N-((2S)-1-(((2S)-6-amino-1-((2-amino-2-oxo-1-(4-((4-(trifluoromethyl) benzyl)oxy)phenyl)ethyl)amino)-1-oxohexan-2-yl)amino)-5-guanidino-1-oxopentan-2-yl)thiophene-2-carboxamide

This compound was synthesized according to literature reported method. [*J. Med. Chem.2015, 58, 9354-9370*](https://pubs.acs.org/doi/abs/10.1021/acs.jmedchem.5b01441)*.* HRMS (ESI‐TOF) m/z [M+H]+ calcd. for C33H41F3N8O5S: 719.2951, found 719.2952.


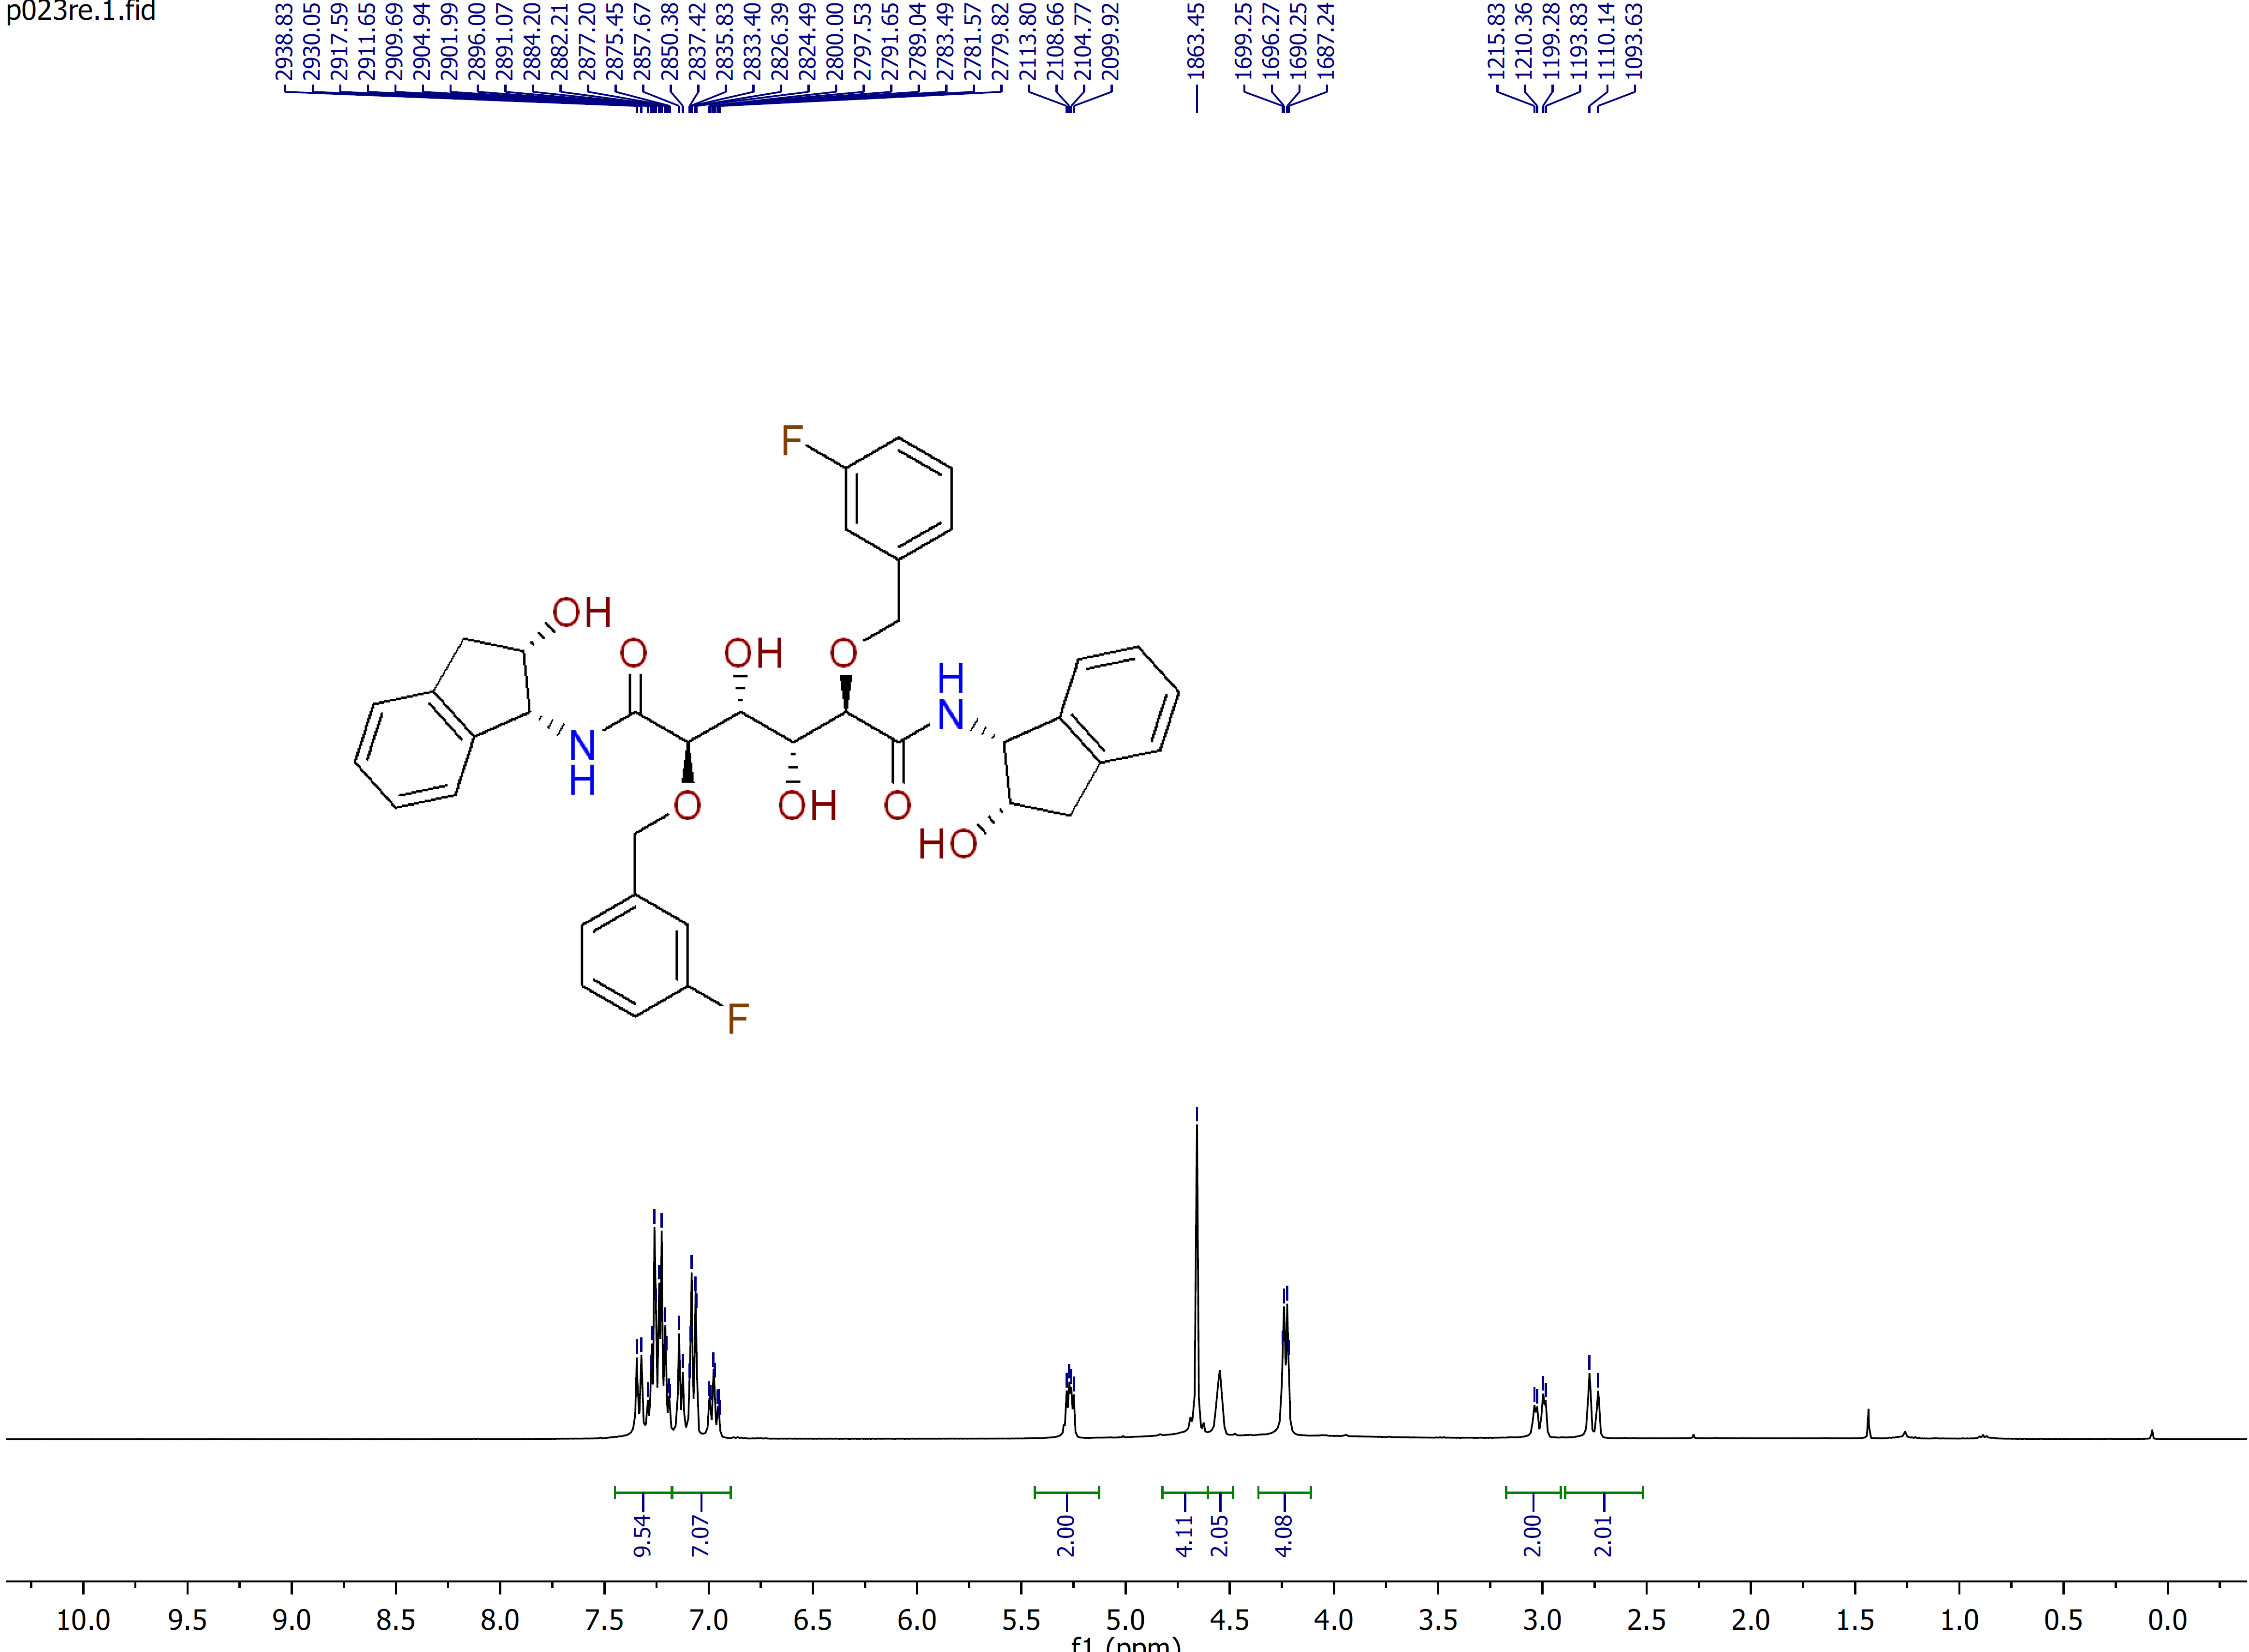


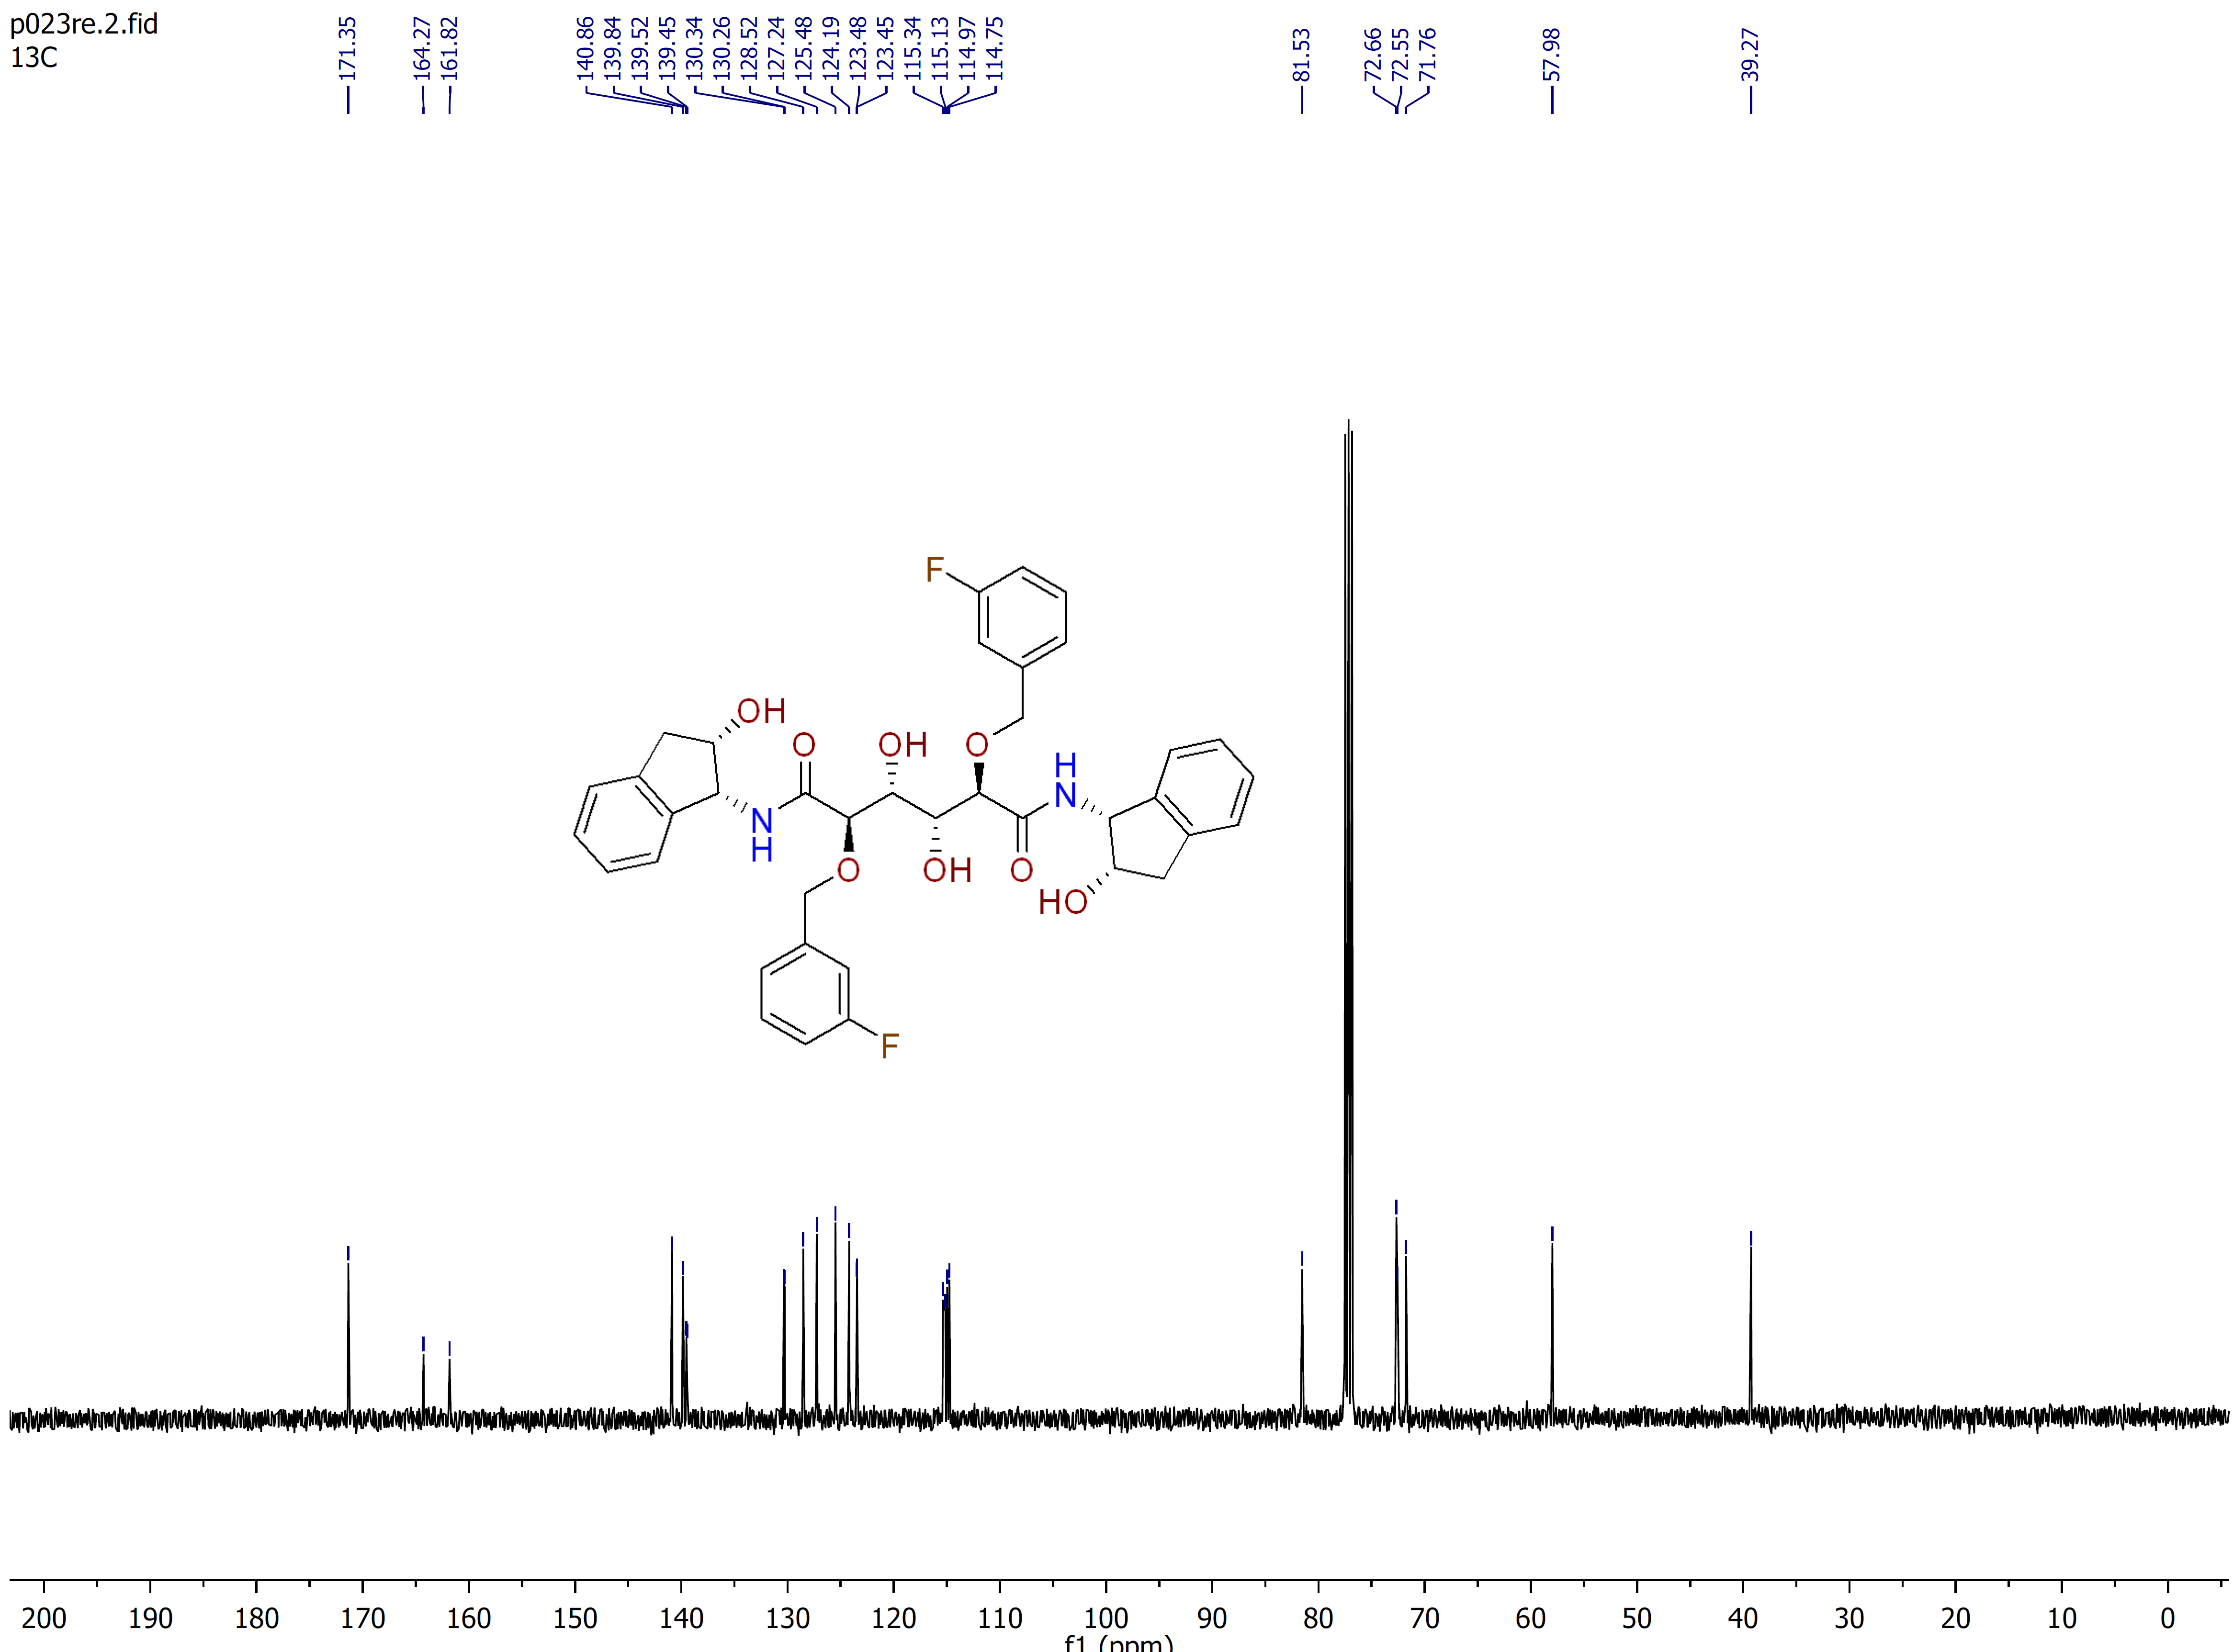


**6.3.Compound 9b purity**


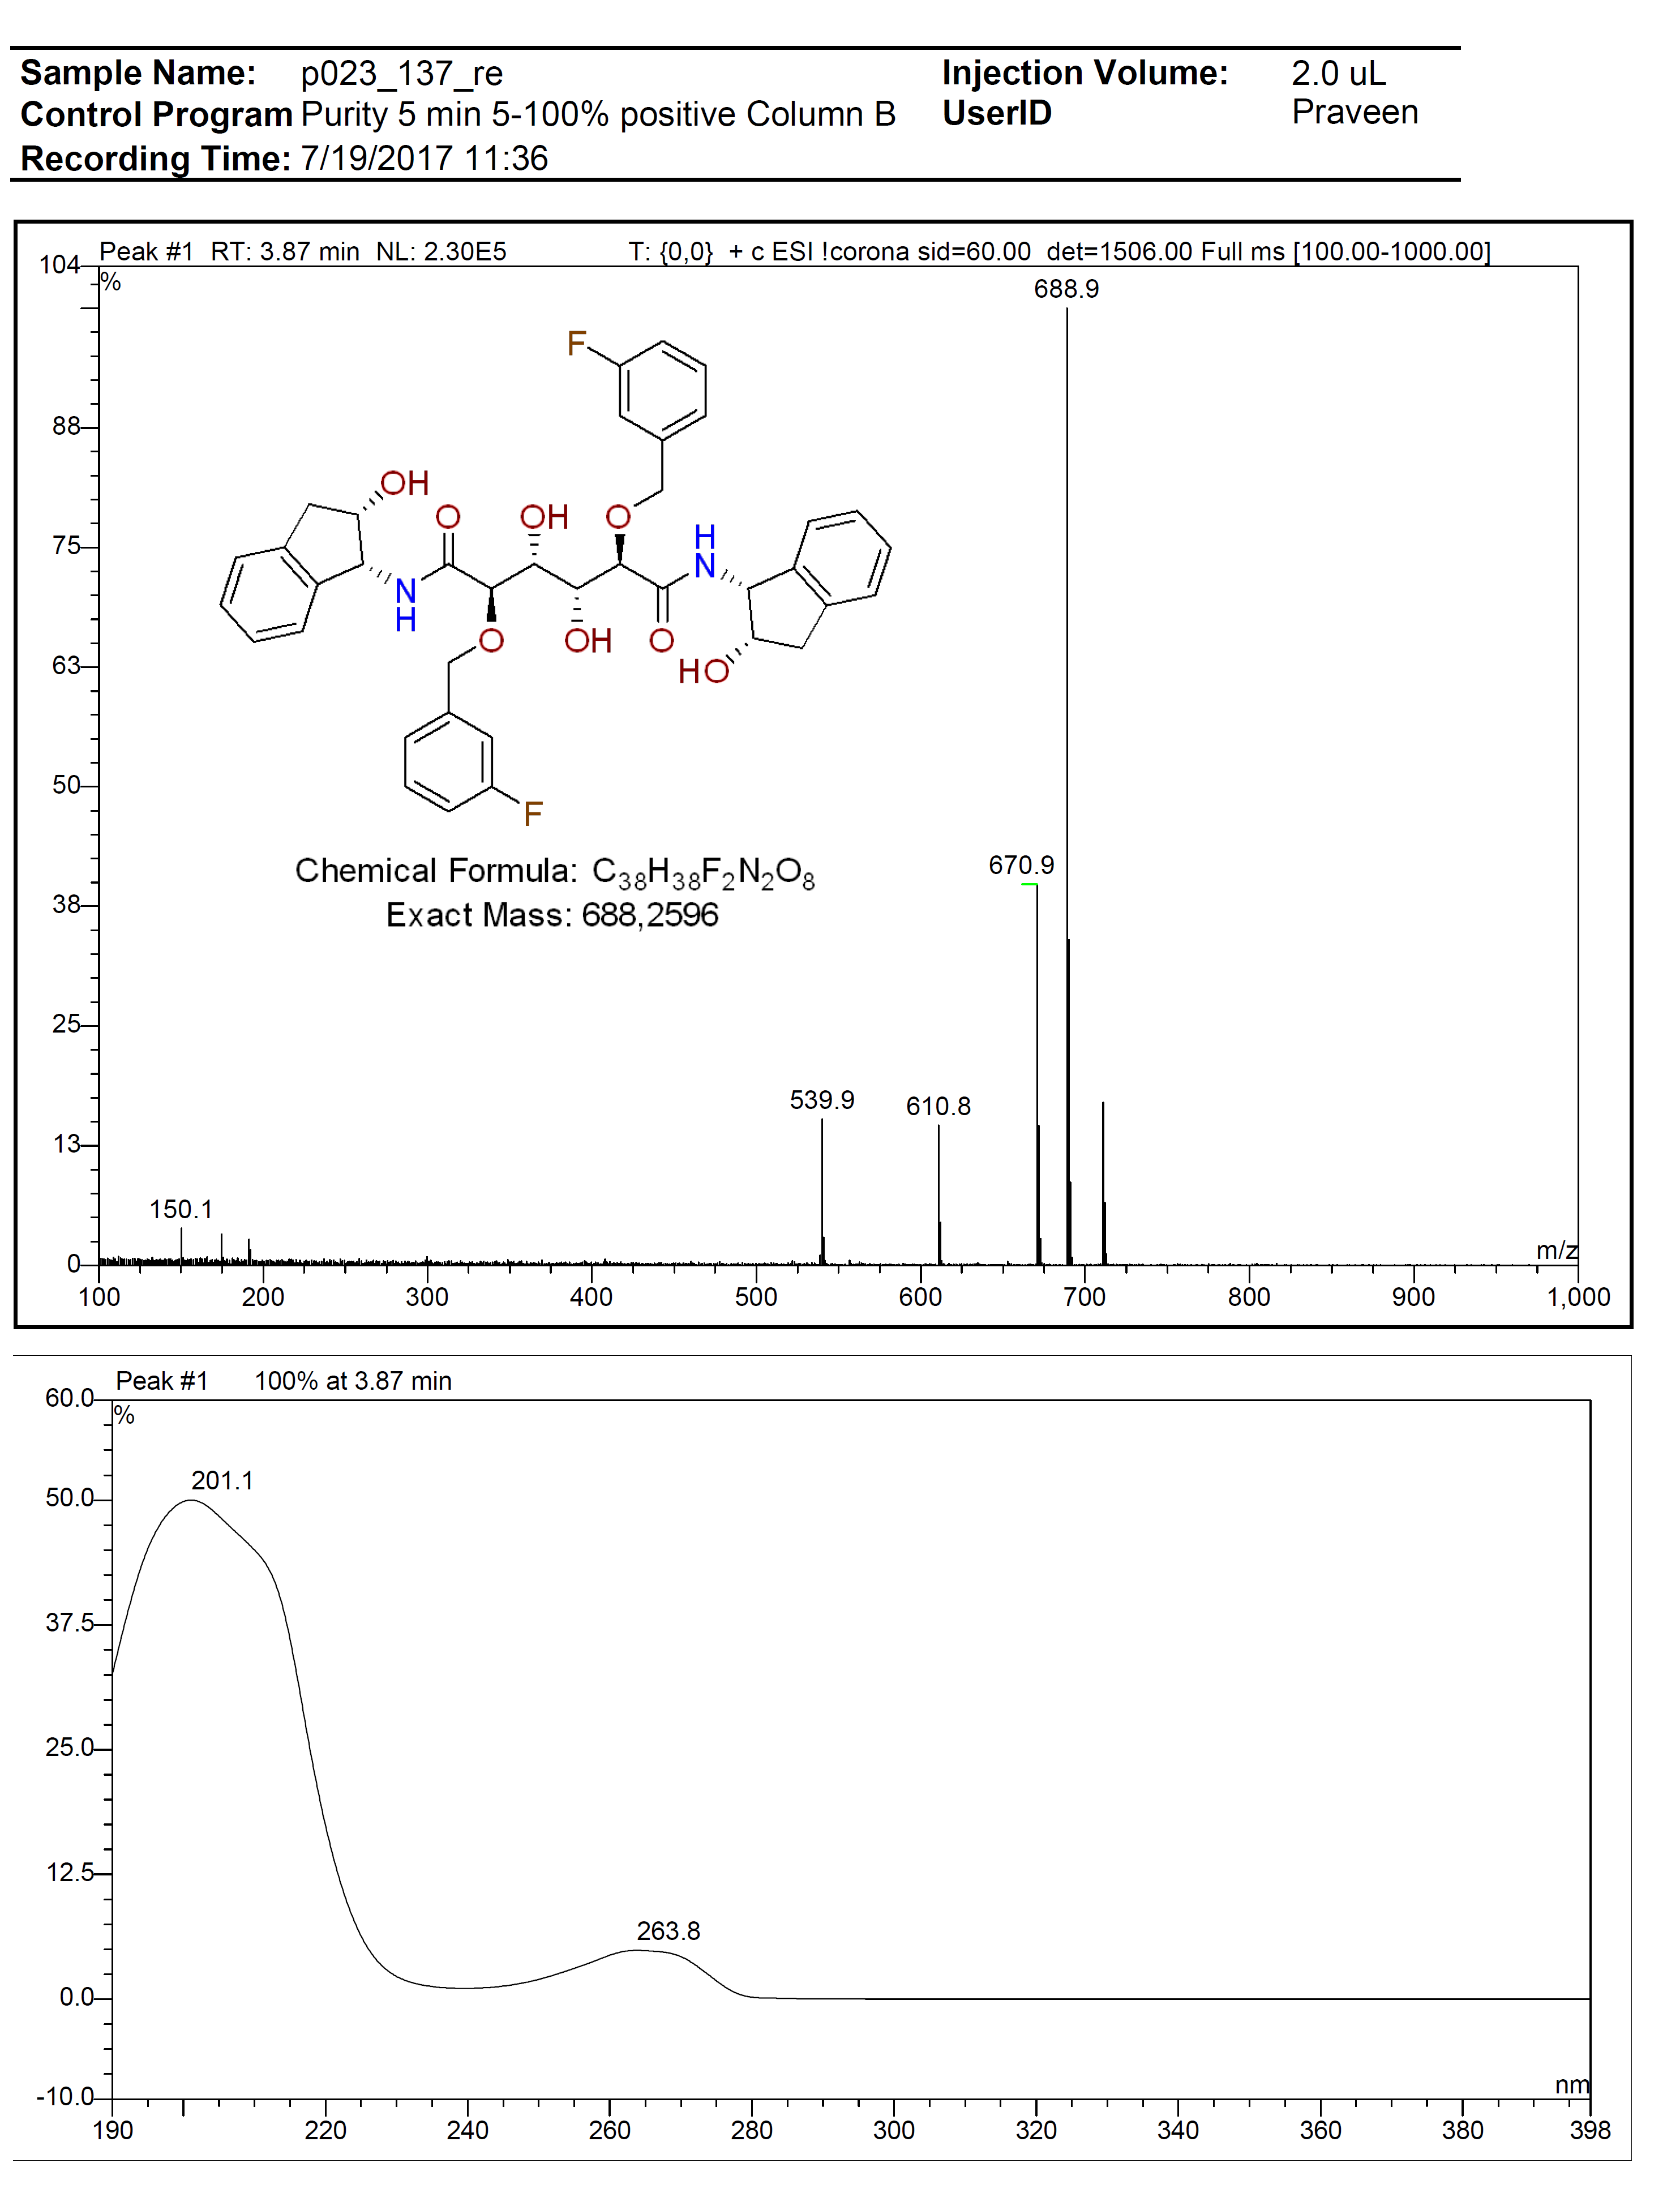


6.4.Compound 86 purity
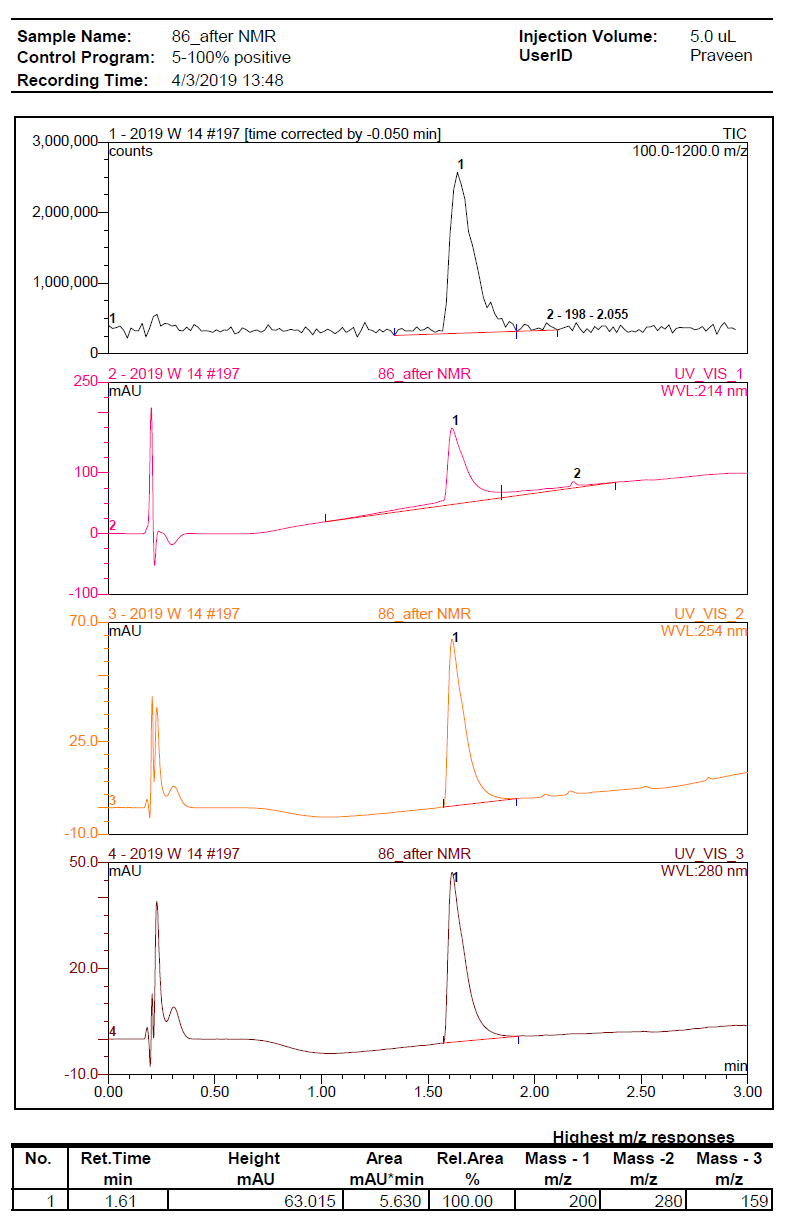


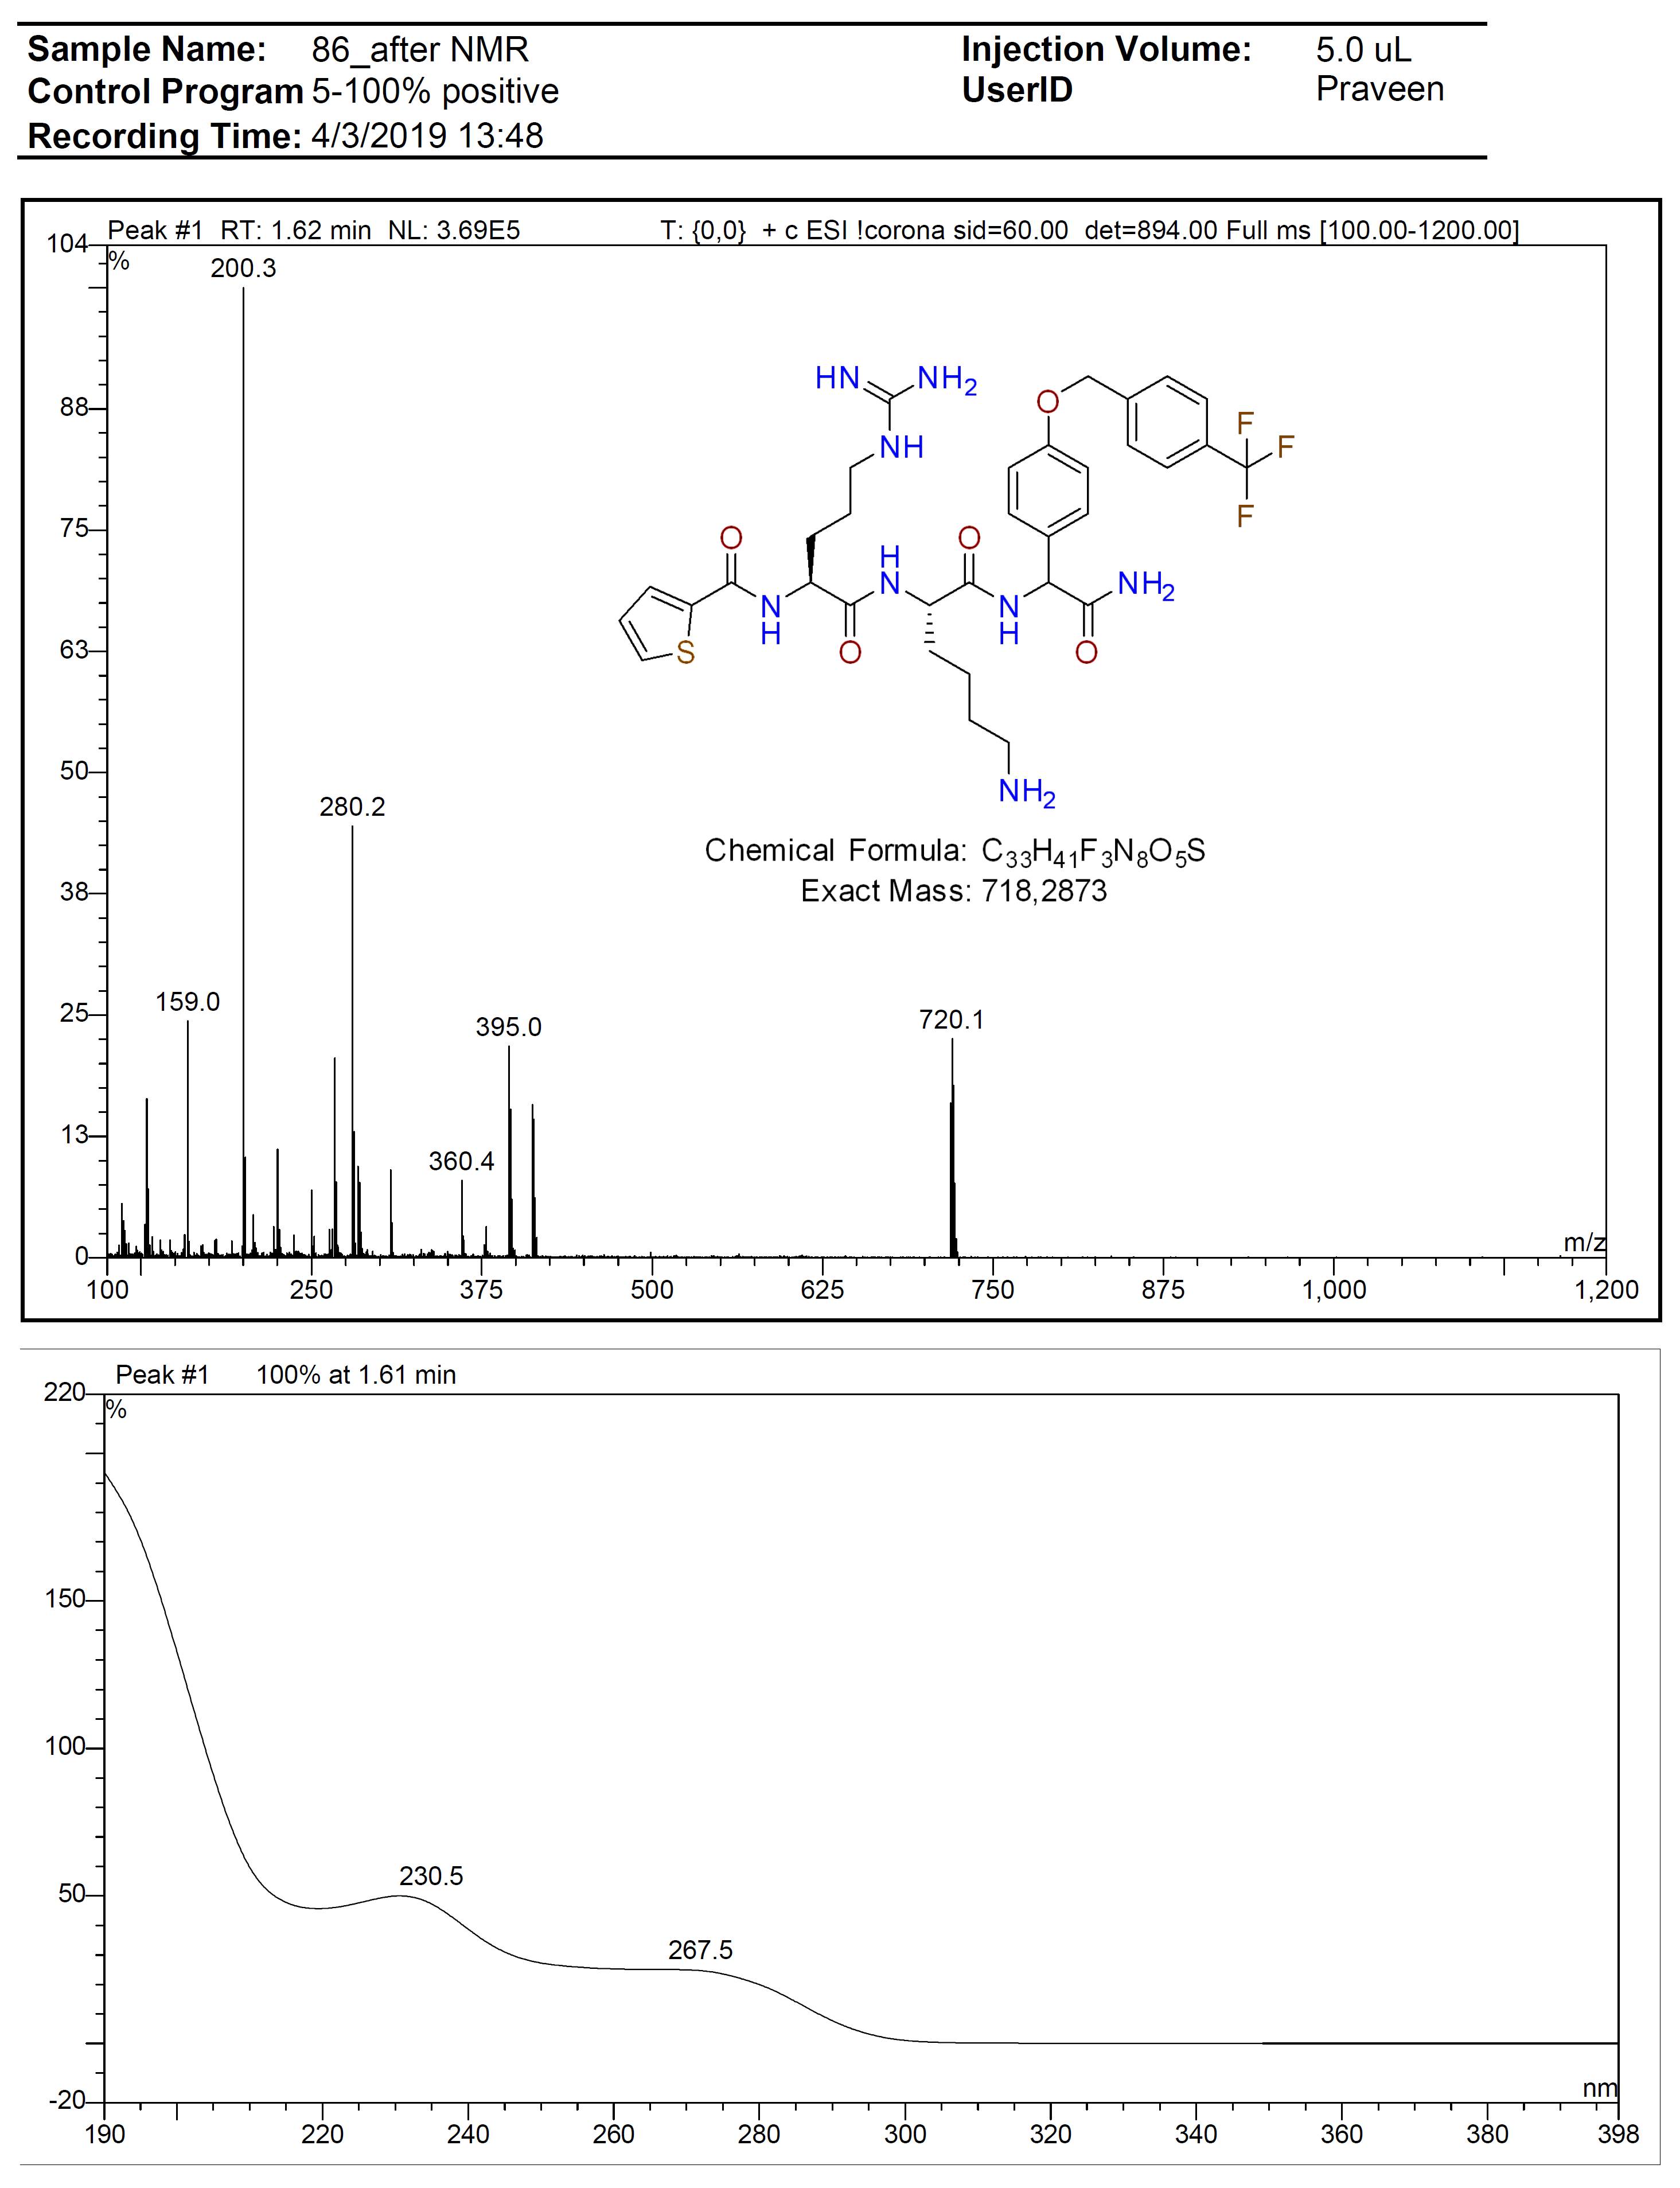

Supplement: Supplementary file 1 [file 20467761]
